# Supplementary material for: The Effect of Risk-Reducing Salpingo-Oophorectomy on Breast Cancer Incidence and Histopathological Features in Women with a BRCA1 or BRCA2 Germline Pathogenic Variant
Source: MDPI journal article supplement (doi:10.3390/cancers15072095), 2023-03-31
Supplement: s1 [file s1]

## Supplementary table

**Table S1. Characteristics of primary breast cancers, including prevalent cancers, comparison pre- and post-RRSO (n=498 breast cancers)**

| Characteristics<br>(n available)        | All, N (%)<br>N=498 | Pre-RRSO, N<br>(%)<br>N=434 | Post-RRSO, N (%)<br>N=65 | P-value<br>Chi-square<br>or<br>Mann-<br>Whitney U |
|-----------------------------------------|---------------------|-----------------------------|--------------------------|---------------------------------------------------|
| <i>BRCA</i> mutation status             |                     |                             |                          |                                                   |
| <i>BRCA1</i>                            | 291 (58.4)          | 250 (57.6)                  | 41 (63.1)                | 0.12                                              |
| <i>BRCA2</i>                            | 208 (41.8)          | 184 (42.4)                  | 24 (36.9)                |                                                   |
| Age at BC, median (IQR)                 | 42.4<br>(36.2-50.6) | 41.7<br>(35.1-49.6)         | 49.1<br>(43.7-54.6)      | <0.001                                            |
| Year of birth, median (IQR)             | 1961 (1953-1970)    | 1961 (1952-1971)            | 1964 (1957-1969)         | <0.001                                            |
| Tumor type                              |                     |                             |                          | 0.015                                             |
| In situ carcinomas                      | 33 (6.6)            | 23 (5.3)                    | 10 (15.6)                |                                                   |
| Invasive NST*                           | 445 (88.6)          | 393 (89.7)                  | 52 (81.3)                |                                                   |
| Lobular                                 | 2 (3.1)             | 17 (3.9)                    | 2 (3.1)                  |                                                   |
| Missing                                 | 0                   | 0                           | 0                        |                                                   |
| Tumour size**                           |                     |                             |                          |                                                   |
| Median mm (IQR)                         | 18 (12-25)          | 19 (13-26)                  | 12 (8-18)                | <0.001                                            |
| Missing                                 | 38                  | 37                          | 1                        |                                                   |
| Estrogen receptor status positive**     | 189 (48.1)          | 165 (48.5)                  | 24 (45.3)                | 0.66                                              |
| Missing                                 | 0                   | 0                           | 0                        |                                                   |
| Progesterone receptor status positive** | 149 (38.5)          | 132 (39.4)                  | 17 (32.7)                | 0.36                                              |
| Missing                                 | 58                  | 58                          | 0                        |                                                   |
| Her-neu2 receptor status positive**     | 20 (6.4)            | 15 (5.6)                    | 5 (10.4)                 | 0.21                                              |
| Missing                                 | 131                 | 127                         | 4                        |                                                   |
| Triple negative**                       | 142 (40.2)          | 118 (39.1)                  | 24 (47.1)                | 0.28                                              |
| Missing                                 | 92                  | 91                          | 1                        |                                                   |
| Tumor grade**                           |                     |                             |                          | 0.29                                              |
| I                                       | 15 (3.8)            | 12 (3.5)                    | 3 (5.8)                  |                                                   |
| II                                      | 115 (29.1)          | 99 (28.9)                   | 16 (30.8)                |                                                   |
| III                                     | 265 (67.1)          | 232 (67.6)                  | 33 (63.5)                |                                                   |
| Missing                                 | 50                  | 50                          | 0                        |                                                   |
| Tumor stage**                           |                     |                             |                          | 0.006                                             |
| pT1                                     | 238 (56.9)          | 199 (53.9)                  | 39 (79.4)                |                                                   |
| pT2                                     | 156 (37.3)          | 148 (40.1)                  | 8 (16.3)                 |                                                   |
| pT3                                     | 174 (4.1)           | 15 (4.1)                    | 2 (4.1)                  |                                                   |
| pT4                                     | 7 (1.7)             | 7 (1.9)                     | 0 (0.0)                  |                                                   |
| Missing                                 | 27                  | 24                          | 3                        |                                                   |
| Lymph node**                            |                     |                             |                          |                                                   |
| pN0                                     | 299 (65.6)          | 263 (64.8)                  | 36 (72.0)                | 0.39                                              |
| pN1                                     | 111 (24.3)          | 98 (24.1)                   | 13 (26.0)                |                                                   |
| pN2                                     | 32 (7.0)            | 31 (7.6)                    | 1 (2.0)                  |                                                   |
| pN3                                     | 13 (2.9)            | 13 (3.2)                    | 0                        |                                                   |
| Missing                                 | 42                  | 28                          | 15                       |                                                   |

\* No special type

\*\* Of invasive tumors
